# Supplementary material
Source: PubMed Central journal article supplement (PMC6322040)
Supplement: AnnalsATS.201803-157SD_seaman_data_supplement.pdf [file AnnalsATS.201803-157SD_seaman_data_supplement.pdf]

## **Online Data Supplement**

### **Protocol and Fidelity Monitoring Plan for Four Supports: A Multicenter Trial of an Intervention to Support Surrogate Decision Makers in ICUs**

Jennifer B. Seaman, Robert M. Arnold, Praewpannarai Buddadhumaruk, Anne-Marie Shields, Rachel M. Gustafson, Kristyn Felman, Wendy Newdick, Rachel SanPedro, Suzanne Mackenzie, Jennifer Q. Morse, Chung-Chou H. Chang, Mary Beth Happ, Mi-Kyung Song, Jeremy M. Kahn, Charles F. Reynolds III, Derek C. Angus, Seth Landefeld, and Douglas B. White

# THE FOUR SUPPORTS STUDY

Pre-Conference Summary Sheet for Clinicians

Bed #: \_\_\_\_\_ Patient Name: \_\_\_\_\_ Date \_\_\_\_/\_\_\_\_/\_\_\_\_

## FACTS ABOUT THE FAMILY

1. Who is involved in decision making?

Any unique family circumstances?    Yes    No

2. Does the surrogate have experience with decision making?    Yes    No

## CURRENT EXPECTATIONS

1. Likelihood patient will not survive to hospital discharge?

Definitely will survive

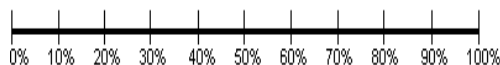

Definitely will not survive

2. Likelihood of severe functional impairment in 6 months?

Definitely will not have Severe Functional Impairment

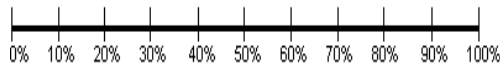

Definitely will have Severe Functional Impairment

## WHAT DO WE KNOW ABOUT THE PATIENT AS A PERSON?

1. Is there a written Advance Directive?    Yes    No

2. If yes, describe content:

3. What do we know about the patient's values and health care preferences?

4. What is important to the patient as a person?

## WHAT ARE THE FAMILY'S 3 MAIN QUESTIONS?

1.

2.

3.

# The Four Supports Study

## Daily Meeting Checklist

Intervention Group     Control Group

| FAMILY INTERACTIONS (Specify type of interaction and length in minutes below):                                                                                                                                                                                                                                                                                                                                                                                                                                                                                                                  |                                                                                                                                                | <input type="checkbox"/> N/A Control Group                                                                                                                                                                                                                                                                                                                                                                                                                                                                                                      |
|-------------------------------------------------------------------------------------------------------------------------------------------------------------------------------------------------------------------------------------------------------------------------------------------------------------------------------------------------------------------------------------------------------------------------------------------------------------------------------------------------------------------------------------------------------------------------------------------------|------------------------------------------------------------------------------------------------------------------------------------------------|-------------------------------------------------------------------------------------------------------------------------------------------------------------------------------------------------------------------------------------------------------------------------------------------------------------------------------------------------------------------------------------------------------------------------------------------------------------------------------------------------------------------------------------------------|
| Mode of communication?<br>List all: (A-E)                                                                                                                                                                                                                                                                                                                                                                                                                                                                                                                                                       | <input type="checkbox"/> F1: _____ <input type="checkbox"/> F3: _____<br><input type="checkbox"/> F2: _____ <input type="checkbox"/> F4: _____ | <u>Type:</u> A. In-person    C. Text    E. Other: _____<br>B. Telephone    D. Left Message                                                                                                                                                                                                                                                                                                                                                                                                                                                      |
| <input type="checkbox"/> <b>FIRST INTERACTION:</b> _____ minutes                                                                                                                                                                                                                                                                                                                                                                                                                                                                                                                                |                                                                                                                                                | <input type="checkbox"/> <b>POST-CONFERENCE:</b> _____ minutes                                                                                                                                                                                                                                                                                                                                                                                                                                                                                  |
| <input type="checkbox"/> Establish a relationship, explain the FSI role<br><input type="checkbox"/> Provide emotional support<br><input type="checkbox"/> Understand family stressors and structure<br><input type="checkbox"/> Elicit the family's understanding<br><input type="checkbox"/> Elicit family's questions and concerns<br><input type="checkbox"/> Inquire about previously expressed healthcare preferences (AD)<br><input type="checkbox"/> Orient the family to the ICU and review unit orientation materials<br><input type="checkbox"/> Finalize scheduling of first meeting |                                                                                                                                                | <input type="checkbox"/> Respond to family needs; allowing them to guide content<br><input type="checkbox"/> Provide emotional support and express empathy<br><input type="checkbox"/> Elicit concerns and questions<br><input type="checkbox"/> Listen for key misunderstandings and concerns<br><input type="checkbox"/> Help family synthesize key information from the clinician                                                                                                                                                            |
| <input type="checkbox"/> <b>PRE-CONFERENCE:</b> _____ minutes                                                                                                                                                                                                                                                                                                                                                                                                                                                                                                                                   |                                                                                                                                                | <input type="checkbox"/> <b>DAILY CHECK-IN:</b> _____ minutes                                                                                                                                                                                                                                                                                                                                                                                                                                                                                   |
| <input type="checkbox"/> Provide emotional support<br><input type="checkbox"/> Explain the purpose of the pre-conference and family meetings<br><input type="checkbox"/> Complete Question Prompt List (QPL)<br><input type="checkbox"/> Explain principles of surrogate decision making<br><input type="checkbox"/> Elicit family understanding/complete prognostic estimates<br><input type="checkbox"/> Conduct values elicitation exercise                                                                                                                                                  |                                                                                                                                                | <input type="checkbox"/> Provide emotional support and empathy<br><input type="checkbox"/> Elicit spiritual needs and involve spiritual care as needed<br><input type="checkbox"/> Offer to discuss what might occur during the dying process<br><input type="checkbox"/> Offer an opportunity for family to gather at the bedside<br><input type="checkbox"/> Facilitate life review<br><input type="checkbox"/> Create space for family members to say good-bye to patient<br><input type="checkbox"/> Answer family's questions and concerns |

| PHYSICIAN INTERACTIONS (Specify type of interaction and length in minutes below):                                                                                                                                                                                                           |  | <input type="checkbox"/> N/A Control Group                                                                                                                                                                                                                                                                                                                                        |
|---------------------------------------------------------------------------------------------------------------------------------------------------------------------------------------------------------------------------------------------------------------------------------------------|--|-----------------------------------------------------------------------------------------------------------------------------------------------------------------------------------------------------------------------------------------------------------------------------------------------------------------------------------------------------------------------------------|
| <input type="checkbox"/> <b>FIRST INTERACTION:</b> _____ minutes                                                                                                                                                                                                                            |  | <input type="checkbox"/> <b>POST-CONFERENCE:</b> _____ minutes                                                                                                                                                                                                                                                                                                                    |
| <input type="checkbox"/> Explain FSI role with emphasis on benefit to ICU team<br><input type="checkbox"/> Elicit MD perception of family needs and patient status<br><input type="checkbox"/> Tentatively schedule the first meeting                                                       |  | <input type="checkbox"/> Continue rapport building<br><input type="checkbox"/> Reflect on impact of meeting and inquire how you can be of help<br><input type="checkbox"/> Provide update about what happened after meeting<br><input type="checkbox"/> Confirm shared understanding of plan of care<br><input type="checkbox"/> Elicit clinician's perceptions of family's needs |
| <input type="checkbox"/> <b>PRE-CONFERENCE:</b> _____ minutes                                                                                                                                                                                                                               |  | <input type="checkbox"/> <b>DAILY CHECK IN:</b> _____ minutes                                                                                                                                                                                                                                                                                                                     |
| <input type="checkbox"/> Elicit clinician's goals for meeting/ perceptions of family needs<br><input type="checkbox"/> Give tailored family info to team including clinician summary sheet<br><input type="checkbox"/> Remind the clinician of the role the FSI will play in the conference |  | <input type="checkbox"/> Check in with clinician about plan of care<br><input type="checkbox"/> Share information elicited from family<br><input type="checkbox"/> Inquire about tasks with which FSI can assist                                                                                                                                                                  |

PT # FS-\_\_\_\_\_    Date \_\_\_\_/\_\_\_\_/\_\_\_\_    Intervention Day # \_\_\_\_\_    Page \_\_\_\_\_ of \_\_\_\_\_

# The Four Supports Study

## Daily Meeting Checklist

Intervention Group     Control Group

**Did a clinician-family meeting occur (Intervention and Control)?**     yes     no    **Specify Type:**     Informal Update     Formal Meeting

**CLINICIAN-FAMILY MEETING INFORMATION:**    **Time of Meeting:** \_\_\_\_\_:\_\_\_\_\_:\_\_\_\_\_    **Length:** \_\_\_\_\_ minutes

|                                                                                                                                                                                                                                                                                                                                                                                                 |                                                                                                                                                                                                                                                               |
|-------------------------------------------------------------------------------------------------------------------------------------------------------------------------------------------------------------------------------------------------------------------------------------------------------------------------------------------------------------------------------------------------|---------------------------------------------------------------------------------------------------------------------------------------------------------------------------------------------------------------------------------------------------------------|
| <input type="checkbox"/> Provide/ensure emotional support provided<br><input type="checkbox"/> Help family ask questions/encourage participation<br><input type="checkbox"/> Listen for and address misunderstandings<br><input type="checkbox"/> Ensure discussion of treatment options, prognosis, patient values as appropriate<br><input type="checkbox"/> Ensure clear plan for next steps | <b>Enrolled surrogates attending meeting:</b><br><br>Family Member ID# _____ Family Member ID# _____<br><br>Family Member ID# _____ Family Member ID# _____<br><br><b>Total Number of Enrolled and Not Enrolled Family Members Present for meeting:</b> _____ |
|-------------------------------------------------------------------------------------------------------------------------------------------------------------------------------------------------------------------------------------------------------------------------------------------------------------------------------------------------------------------------------------------------|---------------------------------------------------------------------------------------------------------------------------------------------------------------------------------------------------------------------------------------------------------------|

|                                                        |                                                                                                                                                                                                                                                                                                                                                         |
|--------------------------------------------------------|---------------------------------------------------------------------------------------------------------------------------------------------------------------------------------------------------------------------------------------------------------------------------------------------------------------------------------------------------------|
| <b>Day of Meeting</b><br><b>Apache II Score:</b> _____ | <b>Enter total number of each type of clinician/hospital staff attending the physician-family meeting: (List total number for each type. If none, enter "zero")</b><br>_____ Nurse    _____ Physician    _____ Student    _____ Respiratory Therapist<br><br>_____ Chaplain/Religious Support    _____ Social Worker<br><br>_____ Other (specify) _____ |
|--------------------------------------------------------|---------------------------------------------------------------------------------------------------------------------------------------------------------------------------------------------------------------------------------------------------------------------------------------------------------------------------------------------------------|

**FOR PATIENTS ENROLLED IN THE CONTROL GROUP AND INTERVENTION GROUP**  
*\*NOTE: THE BELOW THREE DATA POINTS SHOULD BE COLLECTED VIA CHART ABSTRACTION ONLY*

**1. Did the MD meet/update the Family today?**  
 Yes     No

**2. Did the family have a conversation with either a Clinician or Social Worker today?**  
 Yes     No

**3. Did the family receive an update from the bedside nurse today?**  
 Yes     No

**FIELD NOTES (Please specify type of interaction for each comment):**

**CONTROL EDUCATION SESSION 1:** \_\_\_\_\_ minutes     **CONTROL EDUCATION SESSION 2:** \_\_\_\_\_ minutes

|  |  |
|--|--|
|  |  |
|--|--|

PT # FS-    Date     /    /        Intervention Day #         Page      of

Four Supports Overall Protocol Adherence

| Meetings with Family Members <sup>‡</sup>  | Date |  |  |  |  |  |  |  |  |  |
|--------------------------------------------|------|--|--|--|--|--|--|--|--|--|
| (√ box under date column for each meeting) |      |  |  |  |  |  |  |  |  |  |
| First Interaction with the Family          |      |  |  |  |  |  |  |  |  |  |
| Pre-conference                             |      |  |  |  |  |  |  |  |  |  |
| Clinician-Family Conference                |      |  |  |  |  |  |  |  |  |  |
| Post-conference                            |      |  |  |  |  |  |  |  |  |  |
| Daily Check-in*                            |      |  |  |  |  |  |  |  |  |  |
| Daily Check-in attempt**                   |      |  |  |  |  |  |  |  |  |  |
| Life Closure Session                       |      |  |  |  |  |  |  |  |  |  |
| Control Education Session 1                |      |  |  |  |  |  |  |  |  |  |
| Control Education Session 2                |      |  |  |  |  |  |  |  |  |  |
| Patient transferred?                       |      |  |  |  |  |  |  |  |  |  |
| Daily protocol Adherence met?              |      |  |  |  |  |  |  |  |  |  |

\* A=in person B=phone C=text message \*\* D =left message/txt § Saturday/Sunday

| Meetings with Physicians <sup>‡</sup>  | Date |  |  |  |  |  |  |  |  |  |
|----------------------------------------|------|--|--|--|--|--|--|--|--|--|
| First Conversation with the Physician* |      |  |  |  |  |  |  |  |  |  |
| Pre-conference                         |      |  |  |  |  |  |  |  |  |  |
| Post-conference                        |      |  |  |  |  |  |  |  |  |  |
| Daily Check-in                         |      |  |  |  |  |  |  |  |  |  |
| Daily protocol adherence met?          |      |  |  |  |  |  |  |  |  |  |

\*Note: repeat first conversations may occur if patient transfers to floor, returns to ICU or with change in ICU service.

PT# FS-\_\_\_\_\_ Intervention \_\_ Control\_\_ Page\_\_ of \_\_ ‡-Note reason for deviation from protocol schedule on back page



Patient ID: \_\_\_\_\_

Date of Content Delivery: \_\_\_/\_\_\_/\_\_\_

Interventionist ID: \_\_\_ Rater ID \_\_\_

Date of Monitoring: \_\_\_/\_\_\_/\_\_\_

**First Conversation with the Family**

| Meeting Components                                                                                                                                                                                                                                                                    | Yes | No | Quality Rating* | Comment |
|---------------------------------------------------------------------------------------------------------------------------------------------------------------------------------------------------------------------------------------------------------------------------------------|-----|----|-----------------|---------|
| <i>Objective Components</i>                                                                                                                                                                                                                                                           |     |    |                 |         |
| 1. Provide emotional support                                                                                                                                                                                                                                                          |     |    | 1 2 3           |         |
| 2. Establish a relationship                                                                                                                                                                                                                                                           |     |    | 1 2 3           |         |
| 3. Explain FSI Role (may be only reinforcement if family was just consented)                                                                                                                                                                                                          |     |    | 1 2 3           |         |
| 4. Understand Family Stressors and Structure                                                                                                                                                                                                                                          |     |    | 1 2 3           |         |
| 5. Elicit family's understanding                                                                                                                                                                                                                                                      |     |    | 1 2 3           |         |
| 6. Orient the family to the ICU and review unit orientation materials                                                                                                                                                                                                                 |     |    | 1 2 3           |         |
| 7. Elicit family's questions and concerns                                                                                                                                                                                                                                             |     |    | 1 2 3           |         |
| 8. Inquire about previously expressed healthcare preferences (AD)                                                                                                                                                                                                                     |     |    | 1 2 3           |         |
| 9. Finalize scheduling of first meeting (Plan for next steps)                                                                                                                                                                                                                         |     |    | 1 2 3           |         |
| 10. Give/Receive Contact Information                                                                                                                                                                                                                                                  |     |    | 1 2 3           |         |
| <i>Qualitative Components</i>                                                                                                                                                                                                                                                         |     |    |                 |         |
| 11. Incorporates <ul style="list-style-type: none"> <li>• Asking permission</li> <li>• Anticipatory guidance</li> <li>• Bracketing</li> <li>• Summarizing</li> <li>• Pacing</li> <li>• Appropriate pauses</li> <li>• Maintaining central importance of patient as a person</li> </ul> |     |    | 1 2 3           |         |
| <b>Overall Quality of the Intervention Session</b>                                                                                                                                                                                                                                    |     |    | 1 2 3           |         |
| Delivery of content inconsistent with principles of the intervention/ outside the scope of the intervention*<br>*(describe)                                                                                                                                                           |     |    |                 |         |

\* 1= poorly executed/to a minimal extent, 2=moderately well, but not completely/with deficits in quality, 3= with high quality/completely

\*\*Offering pure opinion, unilateral decision-making, display of impatience, disrespect of pt./family values, fomenting or exacerbating conflict

**Content Score: Total \_\_\_/11= \_\_\_%**

**Mean Quality Score \_\_\_**

**Overall Quality of the Intervention Session \_\_\_**

**Delivery of Content Inconsistent with the Principles of the Intervention Y/N**

## Appendix E

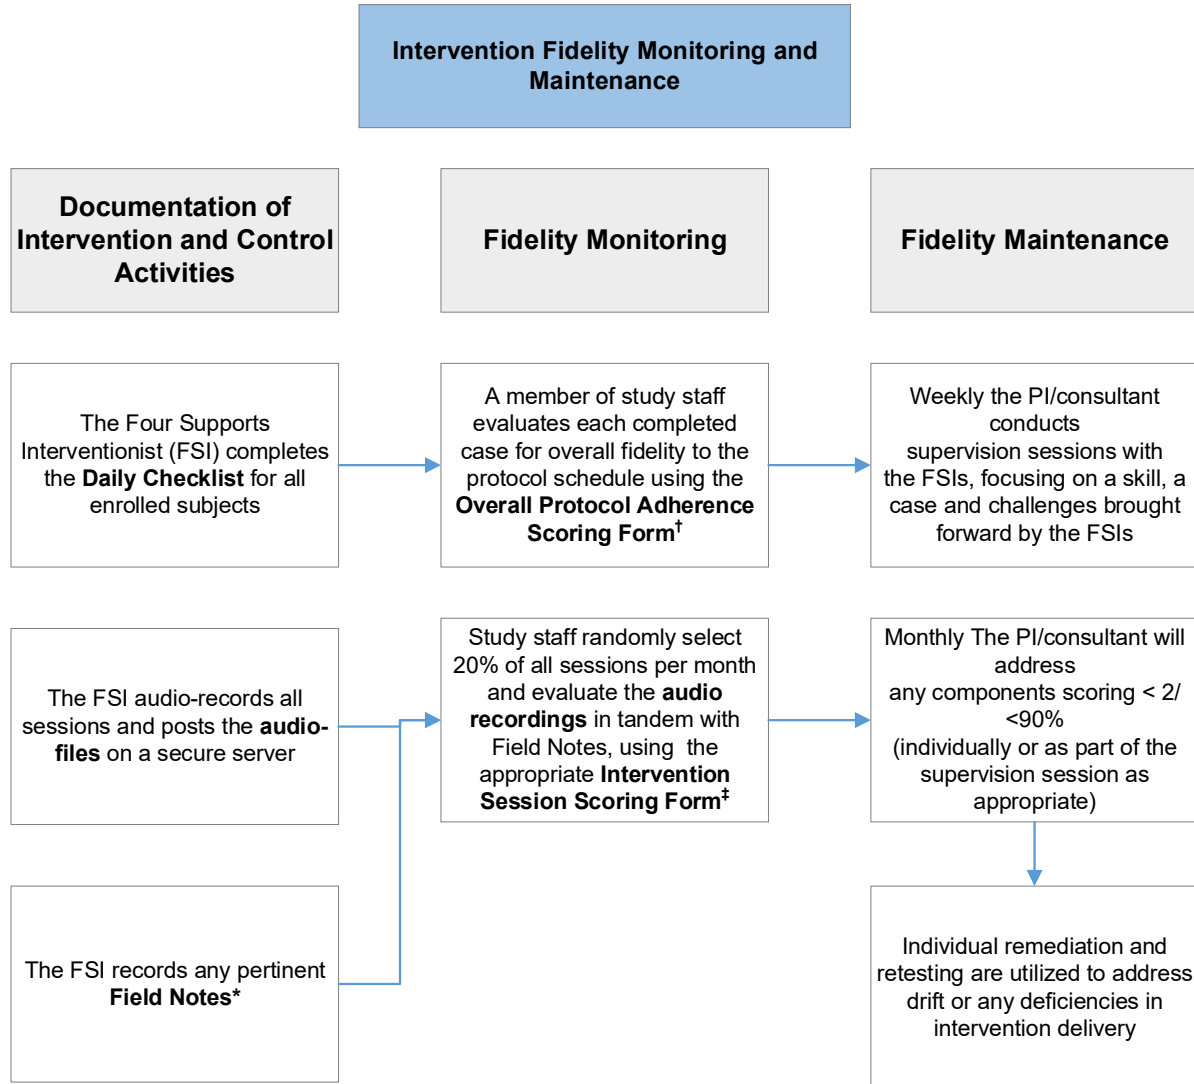

\*Any difficult cases as described in the Field Notes are flagged for supervision

<sup>†</sup> The threshold for overall adherence is  $\geq 90\%$

<sup>‡</sup> The threshold for quality of intervention delivery is  $\geq 2$  (on a scale of 1 to 3); the threshold for content delivery is  $\geq 90\%$ .
